# Supplementary material for: Job satisfaction of public and private primary care physicians in Malaysia: analysis of findings from QUALICO-PC
Source: Hum Resour Health. 2019 Nov 4;17:82. doi: 10.1186/s12960-019-0410-4 (PMC6829856; doi:10.1186/s12960-019-0410-4)
Supplement: Supplementary file 1 — Additional file 1. QUALICO-PC questionnaire for doctors. [file 12960_2019_410_MOESM1_ESM.pdf]

## QUALITY AND COSTS OF PRIMARY CARE (QUALICO-PC)

### Questionnaire for Doctors

|                    |  |
|--------------------|--|
| Name of Clinic:    |  |
| Interview done by: |  |
| Time start:        |  |

| No | Question                                                                                                                              | Response categories                     | Remark                        |
|----|---------------------------------------------------------------------------------------------------------------------------------------|-----------------------------------------|-------------------------------|
| 1  | Are you male or female?                                                                                                               | <input type="radio"/> Male              |                               |
|    |                                                                                                                                       | <input type="radio"/> Female            |                               |
| 2  | What is your year of birth?<br>Please fill in:                                                                                        | Year of birth: 19____                   |                               |
| 3  | Were you born in this country?                                                                                                        | <input type="radio"/> Yes               |                               |
|    |                                                                                                                                       | <input type="radio"/> No                |                               |
| 4  | How would you characterise the place where you are currently practising?                                                              | <input type="radio"/> Big city          | Changed from big (inner) city |
|    |                                                                                                                                       | <input type="radio"/> Suburbs           |                               |
|    |                                                                                                                                       | <input type="radio"/> (Small) town      |                               |
|    |                                                                                                                                       | <input type="radio"/> Mixed-urban rural |                               |
|    |                                                                                                                                       | <input type="radio"/> Rural             |                               |
| 5  | To what extent do you think your practice population compares to the average national level with respect to the following categories: |                                         |                               |
|    | 1. Elderly people (over 70 years)<br><i>[NMCS 2014: 5.7%]</i>                                                                         | <input type="radio"/> Below average     |                               |
|    |                                                                                                                                       | <input type="radio"/> Average           |                               |
|    |                                                                                                                                       | <input type="radio"/> Above average     |                               |
|    |                                                                                                                                       | <input type="radio"/> Don't know        |                               |
|    | 2. Socially disadvantaged people<br><i>[Eligible for BR1M or monthly income per household &lt; RM4000]</i>                            | <input type="radio"/> Below average     |                               |
|    |                                                                                                                                       | <input type="radio"/> Average           |                               |
|    |                                                                                                                                       | <input type="radio"/> Above average     |                               |
|    |                                                                                                                                       | <input type="radio"/> Don't know        |                               |
|    | 3. Ethnic minority people<br><i>[Other than Malay/Chinese/Indian/Iban/Kadazan]</i>                                                    | <input type="radio"/> Below average     |                               |
|    |                                                                                                                                       | <input type="radio"/> Average           |                               |
|    |                                                                                                                                       | <input type="radio"/> Above average     |                               |
|    |                                                                                                                                       | <input type="radio"/> Don't know        |                               |
|    |                                                                                                                                       |                                         |                               |

|    |                                                                                                                            |                                                                                                                                                 |                                                                                                   |
|----|----------------------------------------------------------------------------------------------------------------------------|-------------------------------------------------------------------------------------------------------------------------------------------------|---------------------------------------------------------------------------------------------------|
|    | 4. Elderly people (over 60 years)<br>[NMCS 2014: 15%]                                                                      | <input type="radio"/> Below average<br><input type="radio"/> Average<br><input type="radio"/> Above average<br><input type="radio"/> Don't know |                                                                                                   |
|    | 5. Foreigners<br>[NMCS 2014: 6.2%]                                                                                         | <input type="radio"/> Below average<br><input type="radio"/> Average<br><input type="radio"/> Above average<br><input type="radio"/> Don't know |                                                                                                   |
| 6  | To what extent do you think that the patient turnover in your practice compares to other practices in this country?        | <input type="radio"/> Below average<br><input type="radio"/> Average<br><input type="radio"/> Above average<br><input type="radio"/> Don't know |                                                                                                   |
| 7  | How many hours per week do you work as a medical doctor (excluding additional jobs and on- call or out-of-hours services)? | ____ hours per week                                                                                                                             | Between 8am-5pm                                                                                   |
| 8  | How many of these hours do you spend on direct patient care (consultations, home visits, telephone consultations)?         | ____ hours per week                                                                                                                             | Maximum is the number filled in question 7                                                        |
| 9  | How many patient contacts do you have on a normal working <u>day</u> ?                                                     |                                                                                                                                                 |                                                                                                   |
|    | 1. Face-to-face in your office (number)                                                                                    | ____ per day                                                                                                                                    |                                                                                                   |
|    | 2. By telephone                                                                                                            | ____ per day                                                                                                                                    |                                                                                                   |
|    | 3. By email                                                                                                                | ____ per day                                                                                                                                    |                                                                                                   |
| 10 | How long does a regular patient consultation in your office usually take?                                                  | ____ minutes                                                                                                                                    | To give an estimate of average duration                                                           |
| 11 | In a normal working <u>week</u> , how many patients do you see:                                                            |                                                                                                                                                 |                                                                                                   |
|    | 1. At home visits                                                                                                          | ____ per <u>week</u>                                                                                                                            |                                                                                                   |
|    | 2. In hospital                                                                                                             | ____ per <u>week</u>                                                                                                                            |                                                                                                   |
|    | 3. In homes for the elderly                                                                                                | ____ per <u>week</u>                                                                                                                            |                                                                                                   |
|    | 4. In other institutions or settings                                                                                       | ____ per <u>week</u>                                                                                                                            | Include visits to school, orphanages, pemulihan komuniti , domiciliary care, centres for disabled |
|    | 5. In other clinics                                                                                                        | ____ per <u>week</u>                                                                                                                            | Locum and extended hours                                                                          |
|    |                                                                                                                            |                                                                                                                                                 |                                                                                                   |

|    |                                                                                                                                                   |                                                                                                     |                                                                             |
|----|---------------------------------------------------------------------------------------------------------------------------------------------------|-----------------------------------------------------------------------------------------------------|-----------------------------------------------------------------------------|
| 12 | In the past working month (excluding holidays etc.), how often and for how long did you have on-call duties during evenings, nights and weekends: |                                                                                                     |                                                                             |
|    | 1. During evening(s)                                                                                                                              | ____ times: in total ____ hours                                                                     | 5pm to 10pm                                                                 |
|    | 2. During night(s)                                                                                                                                | ____ times: in total ____ hours                                                                     | 10pm until next morning                                                     |
|    | 3. During weekend days                                                                                                                            | ____ times: in total ____ hours                                                                     |                                                                             |
| 13 | Beside your work as a medical doctor in this practice, do you have any other <u>paid</u> professional activities? (multiple answers possible)     | <input type="checkbox"/> No                                                                         |                                                                             |
|    |                                                                                                                                                   | <input type="checkbox"/> Yes, as a physician for privately paying patients                          | For doctors who provide personal care to specific patients                  |
|    |                                                                                                                                                   | <input type="checkbox"/> Yes, in a residential setting (e.g. nursing home, prison)                  |                                                                             |
|    |                                                                                                                                                   | <input type="checkbox"/> Yes, as a company doctor                                                   | Company doctor-doctor who makes visit to the workplace                      |
|    |                                                                                                                                                   | <input type="checkbox"/> Yes, in teaching/medical education                                         |                                                                             |
|    |                                                                                                                                                   | <input type="checkbox"/> Yes, for extended hours in the public clinics                              |                                                                             |
|    |                                                                                                                                                   | <input type="checkbox"/> Yes, for out-of hours service in private clinics                           | Locum in private clinics                                                    |
|    |                                                                                                                                                   | <input type="checkbox"/> Yes, other<br>Please specify: _____                                        |                                                                             |
| 14 | As a medical doctor, are you self-employed or in salaried employment? (multiple answers possible)                                                 | <input type="checkbox"/> Salaried employment with centre or authority                               | In KK, click this answer                                                    |
|    |                                                                                                                                                   | <input type="checkbox"/> Salaried employment with other medical doctors                             | For doctors who work in a private clinic and getting salary from the clinic |
|    |                                                                                                                                                   | <input type="checkbox"/> Self-employed with contract(s) with health service, insurance or authority | For panel doctor who owns the clinic, click this answer                     |
|    |                                                                                                                                                   | <input type="checkbox"/> Self-employed without contract                                             | For GPs who depend totally on walk-in patients                              |
|    |                                                                                                                                                   |                                                                                                     |                                                                             |

|    |                                                                                                                                                                                |                                                                                                            |                       |                       |                                                                        |
|----|--------------------------------------------------------------------------------------------------------------------------------------------------------------------------------|------------------------------------------------------------------------------------------------------------|-----------------------|-----------------------|------------------------------------------------------------------------|
| 15 | For each of the following components please estimate whether they contribute to your income as a medical doctor, and if so, up to what percentage? (multiple answers possible) | <input type="checkbox"/> Salary ____%                                                                      |                       |                       |                                                                        |
|    |                                                                                                                                                                                | <input type="checkbox"/> Capitation payments ( a fixed sum per patient for a certain period of time) ____% |                       |                       | Payment given to perform a fixed list of procedures                    |
|    |                                                                                                                                                                                | <input type="checkbox"/> Fee for services from third party payer ____%                                     |                       |                       | For Managed Care Organisation(MCO) such as SOCSO or Insurance          |
|    |                                                                                                                                                                                | <input type="checkbox"/> Out-of-pocket payments from patients ____%                                        |                       |                       |                                                                        |
|    |                                                                                                                                                                                | <input type="checkbox"/> Performance payments (for instance related to targets) ____%                      |                       |                       |                                                                        |
|    |                                                                                                                                                                                | <input type="checkbox"/> On-call claim from extended hours in the public clinics ____%                     |                       |                       | For those providing services in the public clinics after office hours  |
|    |                                                                                                                                                                                | <input type="checkbox"/> Out-of hours service in private clinics ____%                                     |                       |                       | For those providing services in the private clinics after office hours |
|    | <input type="checkbox"/> Other sources ____                                                                                                                                    |                                                                                                            |                       |                       |                                                                        |
| 16 | Can you receive an extra financial incentive or bonus for:                                                                                                                     | <b>Yes</b>                                                                                                 | <b>No</b>             | <b>Don't Know</b>     |                                                                        |
|    | 1. Management of patients with diabetes                                                                                                                                        | <input type="radio"/>                                                                                      | <input type="radio"/> | <input type="radio"/> |                                                                        |
|    | 2. Management of patients with hypertension                                                                                                                                    | <input type="radio"/>                                                                                      | <input type="radio"/> | <input type="radio"/> |                                                                        |
|    | 3. Achievement of targets for screening or prevention                                                                                                                          | <input type="radio"/>                                                                                      | <input type="radio"/> | <input type="radio"/> |                                                                        |
|    | 4. Referral rates below a certain level                                                                                                                                        | <input type="radio"/>                                                                                      | <input type="radio"/> | <input type="radio"/> |                                                                        |
|    | 5. Having disadvantaged patients in your practice                                                                                                                              | <input type="radio"/>                                                                                      | <input type="radio"/> | <input type="radio"/> |                                                                        |
|    | 6. Working in a remote area                                                                                                                                                    | <input type="radio"/>                                                                                      | <input type="radio"/> | <input type="radio"/> |                                                                        |
|    |                                                                                                                                                                                |                                                                                                            |                       |                       |                                                                        |

|    |                                                                                                                                                                                                                                                        |                                                                                                        |                                                                                                                                                                          |                                                                                                                                      |
|----|--------------------------------------------------------------------------------------------------------------------------------------------------------------------------------------------------------------------------------------------------------|--------------------------------------------------------------------------------------------------------|--------------------------------------------------------------------------------------------------------------------------------------------------------------------------|--------------------------------------------------------------------------------------------------------------------------------------|
| 17 | Do you work alone or in shared accommodation with one or more medical doctors and/or medical specialists?<br>If part time, please also fill in the total number of hours.<br>(multiple answers allowed)<br>*Include all doctors working in this clinic | <input type="checkbox"/> Alone                                                                         |                                                                                                                                                                          |                                                                                                                                      |
|    |                                                                                                                                                                                                                                                        | <input type="checkbox"/> With other medical doctors/family medicine specialist in shared accommodation | How many in total (including self): ____<br><br>How many full time: ____<br><br>For part time: ____ total working hours (in a week)                                      |                                                                                                                                      |
|    |                                                                                                                                                                                                                                                        | <input type="checkbox"/> With medical specialist(s) in shared accommodation                            | How many in total (including self if 2 <sup>nd</sup> option not ticked): ____<br><br>How many full time: ____<br><br>For part time: ____ total working hours (in a week) | Not to include FTE of the surveyed doctor if above is ticked<br>Medical specialist- any specialist except Family Medicine Specialist |
| 18 | Which of the following disciplines are working in your practice/centre?<br>(Multiple answers allowed)                                                                                                                                                  | <b>Yes</b>                                                                                             |                                                                                                                                                                          | To include visiting personnel                                                                                                        |
|    | 1. Receptionist/medical secretary                                                                                                                                                                                                                      | <input type="checkbox"/>                                                                               |                                                                                                                                                                          | Include clerks                                                                                                                       |
|    | 2. Practice Nurse / Assistant Medical Officers                                                                                                                                                                                                         | <input type="checkbox"/>                                                                               |                                                                                                                                                                          | Staff nurses with diploma/degree in nursing/AMO                                                                                      |
|    | 3. Community/home care nurse                                                                                                                                                                                                                           | <input type="checkbox"/>                                                                               |                                                                                                                                                                          | Jururawat masyarakat in public sector                                                                                                |
|    |                                                                                                                                                                                                                                                        |                                                                                                        |                                                                                                                                                                          |                                                                                                                                      |

|  |                                                                       |                                                      |                                                                                                                                                                                                                                                             |
|--|-----------------------------------------------------------------------|------------------------------------------------------|-------------------------------------------------------------------------------------------------------------------------------------------------------------------------------------------------------------------------------------------------------------|
|  | 4. Psychiatric nurse:<br>4.1 with post-basic<br>4.2 informal training | <input type="checkbox"/><br><input type="checkbox"/> |                                                                                                                                                                                                                                                             |
|  | 5. Nurse practitioner<br>(function between physician and nurse)       | <input type="checkbox"/>                             | A nurse practitioner is a nurse with a Master's degree. He/she functions between a doctor and practice nurse who provides a complete episode of care to patients of any age (This includes patient examination and making clinical decisions on treatment ) |
|  | 6. Assistant for laboratory work                                      | <input type="checkbox"/>                             | Include Medical Lab Assistant (MLT)                                                                                                                                                                                                                         |
|  | 7. Manager of the centre or practice (not a physician)                | <input type="checkbox"/>                             | Administrator                                                                                                                                                                                                                                               |
|  | 8. Midwife                                                            | <input type="checkbox"/>                             |                                                                                                                                                                                                                                                             |
|  | 9. Physiotherapist                                                    | <input type="checkbox"/>                             |                                                                                                                                                                                                                                                             |
|  | 10. Dentist                                                           | <input type="checkbox"/>                             |                                                                                                                                                                                                                                                             |
|  | 11. Pharmacist                                                        | <input type="checkbox"/>                             |                                                                                                                                                                                                                                                             |
|  | 12. Social worker                                                     | <input type="checkbox"/>                             |                                                                                                                                                                                                                                                             |
|  | 13. Nursing aid                                                       | <input type="checkbox"/>                             | Working as nurse with little or without formal training. Qualification for nursing aides: SPM, STPM, Diploma/Degree (Any program unrelated to nursing program)                                                                                              |
|  | 14. TB nurse                                                          | <input type="checkbox"/>                             | Nurses with <b>formal training (post basic training)</b> in the respective field, helping doctors to educate patients and ensure patient's adherence to the management prescribed                                                                           |

|  |                                 |                          |                                                                                                                                                                                                                                                                     |
|--|---------------------------------|--------------------------|---------------------------------------------------------------------------------------------------------------------------------------------------------------------------------------------------------------------------------------------------------------------|
|  | 15. Chronic disease nurse       | <input type="checkbox"/> | Nurses with <b>formal training (post basic training)</b> in the respective field, helping doctors to educate patients and ensure patient's adherence to the management prescribed                                                                                   |
|  | 16. HIV counsellor              | <input type="checkbox"/> | Nurses with <b>formal training (post basic training)</b> in the respective field, helping doctors to educate patients and ensure patient's adherence to the management prescribed                                                                                   |
|  | 17. Methadone maintenance nurse | <input type="checkbox"/> | Nurses with <b>formal training (post basic training)</b> in the respective field, helping doctors to educate patients and ensure patient's adherence to the management prescribed                                                                                   |
|  | 18. Occupational therapist      | <input type="checkbox"/> |                                                                                                                                                                                                                                                                     |
|  | 19. Dietician                   | <input type="checkbox"/> | A dietitian is a health professional who has university qualifications consisting of a 4-year Bachelor Degree in Nutrition and Dietetics or a 3-year Science Degree followed by a Master Degree in Nutrition and Dietetics, including a certain period of practical |

|    |                                                                    |                          |                                                                                                                                                                                                                                                                                |                                 |                                             |
|----|--------------------------------------------------------------------|--------------------------|--------------------------------------------------------------------------------------------------------------------------------------------------------------------------------------------------------------------------------------------------------------------------------|---------------------------------|---------------------------------------------|
|    |                                                                    |                          | training in different hospital and community settings. They may work with people who have special dietary needs, inform the general public about nutrition, evaluate and improve treatments and educate clients, doctors, nurses, health professionals and community groups.   |                                 |                                             |
|    | 20. Nutritionist                                                   | <input type="checkbox"/> | A nutritionist is a non-accredited title that may apply to somebody who has done a short course in nutrition. Nutritionists do not have any professional practical training, and therefore they should not be involved in the diagnosis and dietary treatment of any diseases. |                                 |                                             |
|    | 21. Medication Dispenser                                           | <input type="checkbox"/> |                                                                                                                                                                                                                                                                                |                                 |                                             |
|    | 22. Radiographer                                                   | <input type="checkbox"/> |                                                                                                                                                                                                                                                                                |                                 |                                             |
| 19 | Do you use clinical guidelines for the treatment of the following? | <b>Yes</b>               | <b>No</b>                                                                                                                                                                                                                                                                      | <b>Guidelines Not Available</b> |                                             |
|    | 1. Chronic heart failure                                           | <input type="radio"/>    | <input type="radio"/>                                                                                                                                                                                                                                                          | <input type="radio"/>           |                                             |
|    | 2. Asthma                                                          | <input type="radio"/>    | <input type="radio"/>                                                                                                                                                                                                                                                          | <input type="radio"/>           |                                             |
|    | 3. COPD                                                            | <input type="radio"/>    | <input type="radio"/>                                                                                                                                                                                                                                                          | <input type="radio"/>           | COPD- chronic obstructive pulmonary disease |
|    | 4. Diabetes                                                        | <input type="radio"/>    | <input type="radio"/>                                                                                                                                                                                                                                                          | <input type="radio"/>           |                                             |
|    |                                                                    |                          |                                                                                                                                                                                                                                                                                |                                 |                                             |

|    |                                                                                                                                                                                                                                   |                       |                       |                                                                                                                                                                                                                                                                                    |
|----|-----------------------------------------------------------------------------------------------------------------------------------------------------------------------------------------------------------------------------------|-----------------------|-----------------------|------------------------------------------------------------------------------------------------------------------------------------------------------------------------------------------------------------------------------------------------------------------------------------|
| 20 | In the past 12 months, have you been involved in a disease management programme for patient with the following chronic conditions? (Such programmes are multidisciplinary approaches across practices, often based on protocols). | <b>Yes</b>            | <b>No</b>             | A disease management program will consist of registry, appointment system and has to be a multidisciplinary care(the multidisciplinary care may be provided outside this clinic)<br>Eg:<br>Antenatal/postnatal care in MCH clinics or TB cases involving other medical disciplines |
|    | 1. Chronic heart failure                                                                                                                                                                                                          | <input type="radio"/> | <input type="radio"/> |                                                                                                                                                                                                                                                                                    |
|    | 2. Asthma                                                                                                                                                                                                                         | <input type="radio"/> | <input type="radio"/> |                                                                                                                                                                                                                                                                                    |
|    | 3. COPD                                                                                                                                                                                                                           | <input type="radio"/> | <input type="radio"/> |                                                                                                                                                                                                                                                                                    |
|    | 4. Diabetes                                                                                                                                                                                                                       | <input type="radio"/> | <input type="radio"/> |                                                                                                                                                                                                                                                                                    |
|    | 5. Human Immunodeficiency Virus (HIV)                                                                                                                                                                                             | <input type="radio"/> | <input type="radio"/> |                                                                                                                                                                                                                                                                                    |
|    | 6. Methadone Maintenance Therapy                                                                                                                                                                                                  | <input type="radio"/> | <input type="radio"/> |                                                                                                                                                                                                                                                                                    |
|    | 7. Maternal and Child Health                                                                                                                                                                                                      | <input type="radio"/> | <input type="radio"/> |                                                                                                                                                                                                                                                                                    |
|    | 8. Psychosocial Rehabilitation                                                                                                                                                                                                    | <input type="radio"/> | <input type="radio"/> |                                                                                                                                                                                                                                                                                    |
| 21 | In the past 12 months, has the following occurred in your practice/centre?                                                                                                                                                        | <b>Yes</b>            | <b>No</b>             |                                                                                                                                                                                                                                                                                    |
|    | 1. Feedback on your prescriptions or referrals by health authority or insurer?                                                                                                                                                    | <input type="radio"/> | <input type="radio"/> | Include state level feedback on prescription intervened and prescription error                                                                                                                                                                                                     |
|    | 2. Feedback from colleague medical doctors (peer review or practice visitation)?                                                                                                                                                  | <input type="radio"/> | <input type="radio"/> | Include visiting FMS                                                                                                                                                                                                                                                               |
|    |                                                                                                                                                                                                                                   |                       |                       |                                                                                                                                                                                                                                                                                    |

|    |                                                                                                         |                                                                                                            |                       |                                                                     |  |
|----|---------------------------------------------------------------------------------------------------------|------------------------------------------------------------------------------------------------------------|-----------------------|---------------------------------------------------------------------|--|
|    | 3. Investigation into the satisfaction of your patients?                                                | <input type="radio"/>                                                                                      | <input type="radio"/> | Include Klinik Kawanku patient satisfaction survey in public sector |  |
|    | 4. Feedback from in-house pharmacists                                                                   | <input type="radio"/>                                                                                      | <input type="radio"/> |                                                                     |  |
| 22 | In case of referral, who usually decides about where the patient is referred to?                        | <input type="radio"/> I do                                                                                 |                       |                                                                     |  |
|    |                                                                                                         | <input type="radio"/> The patient does                                                                     |                       |                                                                     |  |
|    |                                                                                                         | <input type="radio"/> It is a shared decision                                                              |                       |                                                                     |  |
| 23 | In case of referral, to what extent do you take into account the following considerations:              | <b>Always</b>                                                                                              | <b>Sometimes</b>      | <b>Never</b>                                                        |  |
|    | 1. The patient's preference where to go                                                                 | <input type="radio"/>                                                                                      | <input type="radio"/> | <input type="radio"/>                                               |  |
|    | 2. The travel distance for the patient                                                                  | <input type="radio"/>                                                                                      | <input type="radio"/> | <input type="radio"/>                                               |  |
|    | 3. Your previous experiences with the medical specialist                                                | <input type="radio"/>                                                                                      | <input type="radio"/> | <input type="radio"/>                                               |  |
|    | 4. Comparative performance information on medical specialists.                                          | <input type="radio"/>                                                                                      | <input type="radio"/> | <input type="radio"/>                                               |  |
|    | 5. Waiting time for the patient                                                                         | <input type="radio"/>                                                                                      | <input type="radio"/> | <input type="radio"/>                                               |  |
|    | 6. Costs for the patient                                                                                | <input type="radio"/>                                                                                      | <input type="radio"/> | <input type="radio"/>                                               |  |
| 24 | Please tick the equipment used in your practice by yourself or your staff (Multiple answers allowed):   |                                                                                                            |                       |                                                                     |  |
|    | <b><u>Laboratory</u></b>                                                                                | <b><u>Functions</u></b>                                                                                    |                       |                                                                     |  |
|    | <input type="radio"/> Haemoglobinometer<br>-Instrument used to determine the haemoglobin level of blood | <input type="radio"/> Audiometer<br>-A machine used for evaluating hearing loss                            |                       |                                                                     |  |
|    | <input type="radio"/> Any blood glucose test set                                                        | <input type="radio"/> Bicycle ergometer<br>-A stationary bicycle to measure the work done by the exercises |                       |                                                                     |  |
|    | <input type="radio"/> Any cholesterol meter                                                             | <input type="radio"/> Eye tonometer<br>-Instrument used to measure the pressure inside the eye             |                       |                                                                     |  |
|    | <input type="radio"/> Blood cell counter<br>- full blood count point of care test                       | <input type="radio"/> Peak flow/PEF meter                                                                  |                       |                                                                     |  |

|    |                                                                                                                            |                                                                    |                                                                       |
|----|----------------------------------------------------------------------------------------------------------------------------|--------------------------------------------------------------------|-----------------------------------------------------------------------|
|    | <input type="radio"/> Bilirubinometer                                                                                      | <input type="radio"/> Spirometer                                   |                                                                       |
|    | <input type="radio"/> HbA1c analyser                                                                                       | <input type="radio"/> Electrocardiograph                           |                                                                       |
|    | <input type="radio"/> Haematological analyser<br>-Instrument used to perform complete (full) blood count                   | <input type="radio"/> Blood pressure meter (BP set)                |                                                                       |
|    | <input type="radio"/> Biochemistry analyser<br>-Instrument used to determine concentration of metabolites and electrolytes | <input type="radio"/> Infusion set                                 |                                                                       |
|    |                                                                                                                            | <input type="radio"/> Doctor's bag for emergencies and home visits |                                                                       |
|    | <b>Imaging</b>                                                                                                             | <b>Other</b>                                                       |                                                                       |
|    | <input type="radio"/> Ophthalmoscope                                                                                       | <input type="radio"/> Urine catheter                               |                                                                       |
|    | <input type="radio"/> Proctoscope                                                                                          | <input type="radio"/> Coagulometer (cautery)                       |                                                                       |
|    | <input type="radio"/> Otoscope                                                                                             | <input type="radio"/> Set for minor surgery                        |                                                                       |
|    | <input type="radio"/> Gastroscope                                                                                          | <input type="radio"/> Suture set                                   |                                                                       |
|    | <input type="radio"/> Sigmoidoscope                                                                                        | <input type="radio"/> Defibrillator                                |                                                                       |
|    | <input type="radio"/> X-ray                                                                                                | <input type="radio"/> Disposable syringes                          |                                                                       |
|    | <input type="radio"/> Ultrasound for abdomen/foetus                                                                        | <input type="radio"/> Disposable gloves                            |                                                                       |
|    | <input type="radio"/> Microscope                                                                                           | <input type="radio"/> Refrigerator for medicines                   |                                                                       |
|    |                                                                                                                            | <input type="radio"/> Resuscitation equipment                      |                                                                       |
|    |                                                                                                                            | <input type="radio"/> Nebuliser                                    |                                                                       |
|    |                                                                                                                            | <input type="radio"/> Alternative birthing Centre (ABC)            |                                                                       |
|    |                                                                                                                            | <input type="radio"/> Dapton                                       | A hand held, portable ultrasound tool used for fetal heart monitoring |
|    |                                                                                                                            | <input type="radio"/> Fundus camera                                |                                                                       |
| 25 | How do you have access to laboratory facilities?                                                                           | <input type="radio"/> Within my practice/centre                    | A laboratory service within clinic facility with dedicated personnel  |
|    |                                                                                                                            | <input type="radio"/> Easy access outside my practice/centre       |                                                                       |
|    |                                                                                                                            | <input type="radio"/> Insufficient access                          |                                                                       |
|    |                                                                                                                            | <input type="radio"/> Within my practice/centre                    |                                                                       |

|    |                                                                                                                 |                                                              |                                                                                                                                      |
|----|-----------------------------------------------------------------------------------------------------------------|--------------------------------------------------------------|--------------------------------------------------------------------------------------------------------------------------------------|
| 26 | How do you have access to X-ray facilities?                                                                     | <input type="radio"/> Easy access outside my practice/centre |                                                                                                                                      |
|    |                                                                                                                 | <input type="radio"/> Insufficient access                    |                                                                                                                                      |
| 27 | What is the distance by road from your(main) practice building to:                                              |                                                              |                                                                                                                                      |
|    | 1. The nearest clinic doctor practice (not in your group or centre)                                             | <input type="radio"/> In the same building                   | Includes Klinik Kesihatan with doctors (medical officer/family medicine specialist): Private clinics And Family Medicine Specialist. |
|    |                                                                                                                 | <input type="radio"/> Less than 10 km                        |                                                                                                                                      |
|    |                                                                                                                 | <input type="radio"/> 11-20 km                               |                                                                                                                                      |
|    |                                                                                                                 | <input type="radio"/> More than 20 km                        |                                                                                                                                      |
|    | 2. The nearest consultant/outpatient clinic (independent or part of hospital)                                   | <input type="radio"/> In the same building                   | Specialist clinics except Family Medicine Specialist clinics                                                                         |
|    |                                                                                                                 | <input type="radio"/> Less than 10 km                        |                                                                                                                                      |
|    |                                                                                                                 | <input type="radio"/> 11-20 km                               |                                                                                                                                      |
|    |                                                                                                                 | <input type="radio"/> More than 20 km                        |                                                                                                                                      |
|    | 3. The nearest general or university hospital                                                                   | <input type="radio"/> In the same building                   |                                                                                                                                      |
|    |                                                                                                                 | <input type="radio"/> Less than 10 km                        |                                                                                                                                      |
|    |                                                                                                                 | <input type="radio"/> 11-20 km                               |                                                                                                                                      |
|    |                                                                                                                 | <input type="radio"/> More than 20 km                        |                                                                                                                                      |
| 28 | How many hours on an average working day is your practice/centre open for patient care (lunch breaks excluded)? | _____ hours per working day                                  | Also includes any breaks observed by the practice during working hours.                                                              |
| 29 | Is it possible for your patients to visit your practice/centre:                                                 |                                                              |                                                                                                                                      |
|    | 1. After 18.00h (at least once per                                                                              | <input type="radio"/> Yes                                    |                                                                                                                                      |

|    |                                                                                                                        |                                                                                                          |                                                                                                                                                              |
|----|------------------------------------------------------------------------------------------------------------------------|----------------------------------------------------------------------------------------------------------|--------------------------------------------------------------------------------------------------------------------------------------------------------------|
|    | week)                                                                                                                  | <input type="radio"/> No                                                                                 |                                                                                                                                                              |
|    | 2. On a weekend day<br>( at least once per month)                                                                      | <input type="radio"/> Yes                                                                                |                                                                                                                                                              |
|    |                                                                                                                        | <input type="radio"/> No                                                                                 |                                                                                                                                                              |
| 30 | During evenings and nights at <u>weekdays</u> , how do your patients have access to (non- emergency) medical services? | <input type="radio"/> I am always available for my patients (Not applicable)                             |                                                                                                                                                              |
|    |                                                                                                                        | <input type="radio"/> I am available on a rota basis with a group of primary care doctors                | This doctor rotates with others to provide out-of-hours care within the same geographical area                                                               |
|    |                                                                                                                        | <input type="radio"/> I am not available, but other primary care doctors are available (on a rota basis) | There are doctors rotating among themselves to provide out-of-hours care within the same geographical area <b>but this doctor does not participate in it</b> |
|    |                                                                                                                        | <input type="radio"/> Other physicians (not primary care doctors) provide out-of-hours care              | The patients in the geographical area visit other doctors besides primary care doctors (e.g. hospital based doctors)                                         |
|    |                                                                                                                        | <input type="radio"/> Other arrangements                                                                 |                                                                                                                                                              |
| 31 | On weekends, how do your patients have access to (non- emergency) medical services?                                    | <input type="radio"/> I am always available for my patients (Not applicable)                             |                                                                                                                                                              |
|    |                                                                                                                        | <input type="radio"/> I am available on a rota basis with a group of primary care doctors                | This doctor rotates with others to provide out-of-hours care within the same                                                                                 |

|    |                                                                                                                  |                                                                                                          |                                                                                                                                                       |
|----|------------------------------------------------------------------------------------------------------------------|----------------------------------------------------------------------------------------------------------|-------------------------------------------------------------------------------------------------------------------------------------------------------|
|    |                                                                                                                  |                                                                                                          | geographical area                                                                                                                                     |
|    |                                                                                                                  | <input type="radio"/> I am not available, but other primary care doctors are available (on a rota basis) | There are doctors rotating among themselves to provide out-of hours care within the same geographical area but this doctor does not participate in it |
|    |                                                                                                                  | <input type="radio"/> Other physicians (not primary care doctors) provide out-of-hours care              | The patients in the geographical area visit other doctors besides primary care                                                                        |
|    |                                                                                                                  | <input type="radio"/> Other arrangements                                                                 |                                                                                                                                                       |
| 32 | What percentage of your patient consultations is by appointment?                                                 | About ____ %                                                                                             |                                                                                                                                                       |
| 33 | Do you offer a walk-in hour?                                                                                     | <input type="radio"/> Yes<br><input type="radio"/> No                                                    |                                                                                                                                                       |
| 34 | In the past 12 months, have you ever done the following to reduce financial obstacles to disadvantaged patients: |                                                                                                          |                                                                                                                                                       |
|    | 1. Provide free samples of medication                                                                            | <input type="radio"/> Yes<br><input type="radio"/> No                                                    | Not applicable for KK                                                                                                                                 |
|    | 2. Prescribe the cheapest equivalent medicine                                                                    | <input type="radio"/> Yes<br><input type="radio"/> No                                                    | Not applicable for KK                                                                                                                                 |
|    | 3. Not charge the patient (e.g. for co-payments)                                                                 | <input type="radio"/> Yes<br><input type="radio"/> No                                                    |                                                                                                                                                       |
|    | 4. Refer to social welfare                                                                                       | <input type="radio"/> Yes<br><input type="radio"/> No                                                    |                                                                                                                                                       |
| 35 | In the past 12 months, how                                                                                       | <input type="radio"/> Frequently                                                                         | Includes                                                                                                                                              |

|    |                                                                                                                           |                                                                                                                                                                                                                                                                                                                                                                                                                                                                                                                                             |                                                                                                |
|----|---------------------------------------------------------------------------------------------------------------------------|---------------------------------------------------------------------------------------------------------------------------------------------------------------------------------------------------------------------------------------------------------------------------------------------------------------------------------------------------------------------------------------------------------------------------------------------------------------------------------------------------------------------------------------------|------------------------------------------------------------------------------------------------|
|    | often have you noticed that patients delayed their visits for financial reasons?                                          | <input type="radio"/> Occasionally<br><input type="radio"/> Never                                                                                                                                                                                                                                                                                                                                                                                                                                                                           | patients who cannot travel to clinic due to financial reasons                                  |
| 36 | If new patients enter your practice, do you receive their medical records from their previous doctor?                     | <input type="radio"/> Yes, always or usually<br><input type="radio"/> Only occasionally<br><input type="radio"/> Rarely or never                                                                                                                                                                                                                                                                                                                                                                                                            | Medical records to include discharge summaries , Teleprimary care records and referral letters |
| 37 | Which restrictions do you apply to accepting new patients? (More than one answer possible)                                | <input type="checkbox"/> No restrictions (everyone is accepted)<br><input type="checkbox"/> No new patients are taken above a maximum number<br><input type="checkbox"/> No new patients are taken above a certain age<br><input type="checkbox"/> No new patients are taken outside my geographical working area<br><input type="checkbox"/> I use a wait period for new patients<br><input type="checkbox"/> Acceptance depends on patients' medical history<br><input type="checkbox"/> Acceptance depends on patients' insurance status | Public Sector only allowed to answer the first answer                                          |
| 38 | Do you provide health care to people, when you are not remunerated for this (for instance uninsured, illegal immigrants)? | <input type="radio"/> Yes, (almost) always<br><input type="radio"/> Yes, but only in urgent cases<br><input type="radio"/> Yes, sometimes<br><input type="radio"/> No<br><input type="radio"/> No such people show up in my practice<br><input type="radio"/> Not applicable (in this country such care is remunerated)<br><input type="radio"/> Not applicable (costs are covered by the government)                                                                                                                                       | For public clinics, please tick this                                                           |
|    |                                                                                                                           |                                                                                                                                                                                                                                                                                                                                                                                                                                                                                                                                             |                                                                                                |

|    |                                                                                         |                                                                                                                                                                                                                                                                                                                                                                                                                                                                                                                  |                                                                                                                                                                    |
|----|-----------------------------------------------------------------------------------------|------------------------------------------------------------------------------------------------------------------------------------------------------------------------------------------------------------------------------------------------------------------------------------------------------------------------------------------------------------------------------------------------------------------------------------------------------------------------------------------------------------------|--------------------------------------------------------------------------------------------------------------------------------------------------------------------|
| 39 | Do your medical files normally include the following information: (Tick all that apply) | <input type="checkbox"/> Living situation<br><br><input type="checkbox"/> Ethnicity<br><br><input type="checkbox"/> Patients' family history (e.g. depression, cancer)<br><br><input type="checkbox"/> Patients' weight and height<br><input type="checkbox"/> Smoking<br><input type="checkbox"/> Blood pressure<br><br><input type="checkbox"/> Reason for encounter<br><br><input type="checkbox"/> Diagnosis<br><input type="checkbox"/> Prescribed medications<br><br><input type="checkbox"/> Test results | Includes social history:<br>E.g Stay alone/with families, lodging condition and sanitation<br><br><br><br><br><br><br><br><br><br>Reason for visit/chief complaint |
| 40 | How do you keep patient medical records? (Tick all that apply)                          | <input type="checkbox"/> I keep records except for minor or trivial complaints<br><input type="checkbox"/> I only keep records of regularly attending patients<br><input type="checkbox"/> I keep records , unless it is too busy<br><input type="checkbox"/> I keep records routinely of all patient contacts<br><br><input type="checkbox"/> Don't know                                                                                                                                                        | For public clinics, please tick this                                                                                                                               |
|    |                                                                                         |                                                                                                                                                                                                                                                                                                                                                                                                                                                                                                                  |                                                                                                                                                                    |

|    |                                                                                                                                                                                          |                                                                                                                                                                                                                                                                                                                                                                                                                                                                                                                                                                                       |                                                                                                                          |
|----|------------------------------------------------------------------------------------------------------------------------------------------------------------------------------------------|---------------------------------------------------------------------------------------------------------------------------------------------------------------------------------------------------------------------------------------------------------------------------------------------------------------------------------------------------------------------------------------------------------------------------------------------------------------------------------------------------------------------------------------------------------------------------------------|--------------------------------------------------------------------------------------------------------------------------|
| 41 | In the past 2 years, have you used your medical record system to list a selection of patient on the basis of age, diagnosis or risk? (Tick all that apply)<br>Both manual and electronic | <input type="checkbox"/> No<br><br><input type="checkbox"/> Yes, by age (e.g. those above age 50)<br><input type="checkbox"/> Yes, by diagnosis or health risk (e.g. diabetes or hypertension)<br><br><input type="checkbox"/> Yes, by medications they take (e.g. patients on multiple medications)<br><br><input type="checkbox"/> Yes, to send reminders for prevention or follow-up<br><br><input type="checkbox"/> I don't know                                                                                                                                                  | Both manual and electronic<br><br><br>For public clinics, check if clinics are involved in registries. If yes, tick this |
| 42 | For which of the following purposes do you use a computer in your practice (Tick all that apply)                                                                                         | <input type="checkbox"/> Not applicable (I don't use a computer)<br><br><input type="checkbox"/> Making appointments<br><input type="checkbox"/> Issuing invoices<br><br><input type="checkbox"/> Issuing drug prescriptions<br><input type="checkbox"/> Keeping records of consultations<br><input type="checkbox"/> Sending referral letters to medical specialists<br><br><input type="checkbox"/> Storing diagnostic test results<br><input type="checkbox"/> Searching medical information on the internet<br><br><input type="checkbox"/> Sending prescriptions to the pharmacy |                                                                                                                          |

|    |                                                                                                          |                        |                         |                               |                                                                          |
|----|----------------------------------------------------------------------------------------------------------|------------------------|-------------------------|-------------------------------|--------------------------------------------------------------------------|
| 43 | How often do you meet face-to-face with the following professionals (either professionally or socially): | <b>Seldom or never</b> | <b>Every 1-3 months</b> | <b>More than once a month</b> |                                                                          |
|    | 1. Other medical doctors                                                                                 | <input type="radio"/>  | <input type="radio"/>   | <input type="radio"/>         | Exclude medical specialist                                               |
|    | 2. Practice nurse                                                                                        | <input type="radio"/>  | <input type="radio"/>   | <input type="radio"/>         | Staff nurses with diploma/degree in nursing                              |
|    | 3. Ambulatory medical specialist                                                                         | <input type="radio"/>  | <input type="radio"/>   | <input type="radio"/>         | Other specialist from a clinic <b>besides</b> family medicine specialist |
|    | 4. Hospital medical specialist                                                                           | <input type="radio"/>  | <input type="radio"/>   | <input type="radio"/>         |                                                                          |
|    | 5. Pharmacist                                                                                            | <input type="radio"/>  | <input type="radio"/>   | <input type="radio"/>         |                                                                          |
|    | 6. Home care nurse                                                                                       | <input type="radio"/>  | <input type="radio"/>   | <input type="radio"/>         |                                                                          |
|    | 7. Midwife                                                                                               | <input type="radio"/>  | <input type="radio"/>   | <input type="radio"/>         |                                                                          |
|    | 8. Physiotherapist                                                                                       | <input type="radio"/>  | <input type="radio"/>   | <input type="radio"/>         |                                                                          |
|    | 9. Social worker                                                                                         | <input type="radio"/>  | <input type="radio"/>   | <input type="radio"/>         |                                                                          |
|    | 10. Dietician                                                                                            | <input type="radio"/>  | <input type="radio"/>   | <input type="radio"/>         |                                                                          |
|    | 11. Family medicine specialist                                                                           | <input type="radio"/>  | <input type="radio"/>   | <input type="radio"/>         |                                                                          |
| 44 | How often do you ask advice (e.g. by telephone) from the following medical specialists?                  | <b>Seldom or never</b> | <b>Every 1-3 months</b> | <b>More than once a month</b> |                                                                          |
|    | 1. Paediatrician                                                                                         | <input type="radio"/>  | <input type="radio"/>   | <input type="radio"/>         |                                                                          |

|    |                                                                                                                                                                                            |                                                                                                                                                                                                                       |                       |                       |  |
|----|--------------------------------------------------------------------------------------------------------------------------------------------------------------------------------------------|-----------------------------------------------------------------------------------------------------------------------------------------------------------------------------------------------------------------------|-----------------------|-----------------------|--|
|    | 2. Internist or physician (one with MRCP qualification)                                                                                                                                    | <input type="radio"/>                                                                                                                                                                                                 | <input type="radio"/> | <input type="radio"/> |  |
|    | 3. Gynaecologist                                                                                                                                                                           | <input type="radio"/>                                                                                                                                                                                                 | <input type="radio"/> | <input type="radio"/> |  |
|    | 4. Surgeon                                                                                                                                                                                 | <input type="radio"/>                                                                                                                                                                                                 | <input type="radio"/> | <input type="radio"/> |  |
|    | 5. Neurologist                                                                                                                                                                             | <input type="radio"/>                                                                                                                                                                                                 | <input type="radio"/> | <input type="radio"/> |  |
|    | 6. Dermatologist                                                                                                                                                                           | <input type="radio"/>                                                                                                                                                                                                 | <input type="radio"/> | <input type="radio"/> |  |
|    | 7. Geriatrician                                                                                                                                                                            | <input type="radio"/>                                                                                                                                                                                                 | <input type="radio"/> | <input type="radio"/> |  |
|    | 8. Psychiatrist/ mental health professional                                                                                                                                                | <input type="radio"/>                                                                                                                                                                                                 | <input type="radio"/> | <input type="radio"/> |  |
|    | 9. Radiologist                                                                                                                                                                             | <input type="radio"/>                                                                                                                                                                                                 | <input type="radio"/> | <input type="radio"/> |  |
| 45 | Does your practice nurse (staff nurse and assistant medical officer) or assistant independently provide:                                                                                   | <input type="radio"/> Not applicable (No nurse in my practice)                                                                                                                                                        |                       |                       |  |
|    | 1. Immunisation                                                                                                                                                                            | <input type="radio"/> Yes<br><input type="radio"/> No                                                                                                                                                                 |                       |                       |  |
|    | 2. Health promotion (e.g. giving lifestyle or smoking cessation advice)                                                                                                                    | <input type="radio"/> Yes<br><input type="radio"/> No                                                                                                                                                                 |                       |                       |  |
|    | 3. Routine checks of chronically ill patients (e.g. diabetes)                                                                                                                              | <input type="radio"/> Yes<br><input type="radio"/> No                                                                                                                                                                 |                       |                       |  |
|    | 4. Minor procedures (e.g. ear syringing, wound treatment)                                                                                                                                  | <input type="radio"/> Yes<br><input type="radio"/> No                                                                                                                                                                 |                       |                       |  |
| 46 | To what extent do you use referral letters ( <b>including details on provisional diagnosis and possible test results</b> ) when you refer patients to a medical specialist? I use letters: | <input type="radio"/> For all patients that I refer<br><input type="radio"/> For most patients that I refer<br><input type="radio"/> For a minority of patients that I refer<br><input type="radio"/> Seldom or never |                       |                       |  |
| 47 | To what extent do medical specialists inform you after they have finished the treatment or diagnostics of your patients?                                                                   | <input type="radio"/> (Almost) always<br><input type="radio"/> Usually<br><input type="radio"/> Occasionally<br><input type="radio"/> Seldom or never                                                                 |                       |                       |  |
|    |                                                                                                                                                                                            |                                                                                                                                                                                                                       |                       |                       |  |

|    |                                                                                                                                                                |                                                                    |  |  |  |                                                                                                                                                |
|----|----------------------------------------------------------------------------------------------------------------------------------------------------------------|--------------------------------------------------------------------|--|--|--|------------------------------------------------------------------------------------------------------------------------------------------------|
| 48 | After a patient has been discharged, how long does it usually take to receive a (summary) discharge report from the hospital most frequented by your patients? | <input type="radio"/> 1-4 days                                     |  |  |  | This question is asking if you receive discharge report directly from the hospital. If yes, how long does it take to get the discharge report. |
|    |                                                                                                                                                                | <input type="radio"/> 5-14 days                                    |  |  |  |                                                                                                                                                |
|    |                                                                                                                                                                | <input type="radio"/> 15-30 days                                   |  |  |  |                                                                                                                                                |
|    |                                                                                                                                                                | <input type="radio"/> More than 30 days                            |  |  |  |                                                                                                                                                |
|    |                                                                                                                                                                | <input type="radio"/> I rarely or never receive a discharge report |  |  |  |                                                                                                                                                |

  

|    |                                                                                                                                                                                                                                                                                                         |                       |                       |                       |                       |  |
|----|---------------------------------------------------------------------------------------------------------------------------------------------------------------------------------------------------------------------------------------------------------------------------------------------------------|-----------------------|-----------------------|-----------------------|-----------------------|--|
| 49 | In case of the following health problems, to what extent will patients in your practice population (people who normally apply to you for primary medical care) contact you as the first health care provider? (This is only about the <b>first contact</b> , not about further diagnosis or treatment). | (Almost) Always       | Usually               | Occasionally          | Seldom or Never       |  |
|    | 1. Child with severe cough                                                                                                                                                                                                                                                                              | <input type="radio"/> | <input type="radio"/> | <input type="radio"/> | <input type="radio"/> |  |
|    | 2. Child aged 8 with hearing problem                                                                                                                                                                                                                                                                    | <input type="radio"/> | <input type="radio"/> | <input type="radio"/> | <input type="radio"/> |  |
|    | 3. Woman aged 18 asking for oral contraception                                                                                                                                                                                                                                                          | <input type="radio"/> | <input type="radio"/> | <input type="radio"/> | <input type="radio"/> |  |
|    | 4. Man aged 24 with stomach pain                                                                                                                                                                                                                                                                        | <input type="radio"/> | <input type="radio"/> | <input type="radio"/> | <input type="radio"/> |  |
|    | 5. Man aged 45 with chest pain                                                                                                                                                                                                                                                                          | <input type="radio"/> | <input type="radio"/> | <input type="radio"/> | <input type="radio"/> |  |

|    |                                                                                                                                                                                                                               |                        |                       |                       |                        |  |
|----|-------------------------------------------------------------------------------------------------------------------------------------------------------------------------------------------------------------------------------|------------------------|-----------------------|-----------------------|------------------------|--|
|    | 6. Woman aged 50 with a lump in her breast                                                                                                                                                                                    | <input type="radio"/>  | <input type="radio"/> | <input type="radio"/> | <input type="radio"/>  |  |
|    | 7. Woman aged 60 with deteriorating vision                                                                                                                                                                                    | <input type="radio"/>  | <input type="radio"/> | <input type="radio"/> | <input type="radio"/>  |  |
|    | 8. Woman aged 60 with polyuria                                                                                                                                                                                                | <input type="radio"/>  | <input type="radio"/> | <input type="radio"/> | <input type="radio"/>  |  |
|    | 9. Woman aged 60 with acute symptoms of paralysis/paresis                                                                                                                                                                     | <input type="radio"/>  | <input type="radio"/> | <input type="radio"/> | <input type="radio"/>  |  |
|    | 10. Man aged 70 with joint pain                                                                                                                                                                                               | <input type="radio"/>  | <input type="radio"/> | <input type="radio"/> | <input type="radio"/>  |  |
|    | 11. Woman aged 75 with moderate memory problems                                                                                                                                                                               | <input type="radio"/>  | <input type="radio"/> | <input type="radio"/> | <input type="radio"/>  |  |
|    | 12. Man aged 35 with sprained ankle                                                                                                                                                                                           | <input type="radio"/>  | <input type="radio"/> | <input type="radio"/> | <input type="radio"/>  |  |
|    | 13. Man aged 28 with a first convulsion                                                                                                                                                                                       | <input type="radio"/>  | <input type="radio"/> | <input type="radio"/> | <input type="radio"/>  |  |
|    | 14. Anxious man aged 45                                                                                                                                                                                                       | <input type="radio"/>  | <input type="radio"/> | <input type="radio"/> | <input type="radio"/>  |  |
|    | 15. Physically abused child aged 13                                                                                                                                                                                           | <input type="radio"/>  | <input type="radio"/> | <input type="radio"/> | <input type="radio"/>  |  |
|    | 16. Couple with relationship problems                                                                                                                                                                                         | <input type="radio"/>  | <input type="radio"/> | <input type="radio"/> | <input type="radio"/>  |  |
|    | 17. Woman aged 50 with psychosocial problems                                                                                                                                                                                  | <input type="radio"/>  | <input type="radio"/> | <input type="radio"/> | <input type="radio"/>  |  |
|    | 18. Man aged 32 with sexual problems                                                                                                                                                                                          | <input type="radio"/>  | <input type="radio"/> | <input type="radio"/> | <input type="radio"/>  |  |
|    | 19. Man aged 52 with alcohol addiction problems                                                                                                                                                                               | <input type="radio"/>  | <input type="radio"/> | <input type="radio"/> | <input type="radio"/>  |  |
| 50 | To what extent are you involved in the treatment and follow-up of patients in your practice population with the following diagnoses ('practice population' means: people who normally apply to you for primary medical care)? | <b>(Almost) Always</b> | <b>Usually</b>        | <b>Occasionally</b>   | <b>Seldom or Never</b> |  |
|    | 1. Chronic bronchitis/ COPD                                                                                                                                                                                                   | <input type="radio"/>  | <input type="radio"/> | <input type="radio"/> | <input type="radio"/>  |  |
|    | 2. Hordeolum (Stye)                                                                                                                                                                                                           | <input type="radio"/>  | <input type="radio"/> | <input type="radio"/> | <input type="radio"/>  |  |
|    | 3. Peptic ulcer                                                                                                                                                                                                               | <input type="radio"/>  | <input type="radio"/> | <input type="radio"/> | <input type="radio"/>  |  |
|    | 4. Herniated disc lesion                                                                                                                                                                                                      | <input type="radio"/>  | <input type="radio"/> | <input type="radio"/> | <input type="radio"/>  |  |
|    | 5. Congestive heart failure                                                                                                                                                                                                   | <input type="radio"/>  | <input type="radio"/> | <input type="radio"/> | <input type="radio"/>  |  |
|    | 6. Pneumonia                                                                                                                                                                                                                  | <input type="radio"/>  | <input type="radio"/> | <input type="radio"/> | <input type="radio"/>  |  |
|    | 7. Peritonsillar abscess                                                                                                                                                                                                      | <input type="radio"/>  | <input type="radio"/> | <input type="radio"/> | <input type="radio"/>  |  |
|    | 8. Parkinson's disease                                                                                                                                                                                                        | <input type="radio"/>  | <input type="radio"/> | <input type="radio"/> | <input type="radio"/>  |  |
|    | 9. Uncomplicated diabetes (type II)                                                                                                                                                                                           | <input type="radio"/>  | <input type="radio"/> | <input type="radio"/> | <input type="radio"/>  |  |

|    |                                                                                                                                                                                                                                                                                                             |                                                                                                                                                                                                                                                 |                       |                       |                       |  |
|----|-------------------------------------------------------------------------------------------------------------------------------------------------------------------------------------------------------------------------------------------------------------------------------------------------------------|-------------------------------------------------------------------------------------------------------------------------------------------------------------------------------------------------------------------------------------------------|-----------------------|-----------------------|-----------------------|--|
|    | 10. Rheumatoid arthritis                                                                                                                                                                                                                                                                                    | <input type="radio"/>                                                                                                                                                                                                                           | <input type="radio"/> | <input type="radio"/> | <input type="radio"/> |  |
|    | 11. Depression                                                                                                                                                                                                                                                                                              | <input type="radio"/>                                                                                                                                                                                                                           | <input type="radio"/> | <input type="radio"/> | <input type="radio"/> |  |
|    | 12. Myocardial infarction                                                                                                                                                                                                                                                                                   | <input type="radio"/>                                                                                                                                                                                                                           | <input type="radio"/> | <input type="radio"/> | <input type="radio"/> |  |
| 51 | To what extent are the following activities carried out in your practice population by you (or your staff) and not by a medical specialist? (Practice population means: people normally applying to you for primary medical care). For example, if fundoscopy is (almost) always done by you, tick that box | (Almost)<br>Always                                                                                                                                                                                                                              | Usually               | Occasionally          | Seldom<br>or Never    |  |
|    | 1. Wedge resection of ingrown toenail                                                                                                                                                                                                                                                                       | <input type="radio"/>                                                                                                                                                                                                                           | <input type="radio"/> | <input type="radio"/> | <input type="radio"/> |  |
|    | 2. Removal of sebaceous cyst from the hairy scalp                                                                                                                                                                                                                                                           | <input type="radio"/>                                                                                                                                                                                                                           | <input type="radio"/> | <input type="radio"/> | <input type="radio"/> |  |
|    | 3. Wound suturing                                                                                                                                                                                                                                                                                           | <input type="radio"/>                                                                                                                                                                                                                           | <input type="radio"/> | <input type="radio"/> | <input type="radio"/> |  |
|    | 4. Excision of warts                                                                                                                                                                                                                                                                                        | <input type="radio"/>                                                                                                                                                                                                                           | <input type="radio"/> | <input type="radio"/> | <input type="radio"/> |  |
|    | 5. Insertion of IUD                                                                                                                                                                                                                                                                                         | <input type="radio"/>                                                                                                                                                                                                                           | <input type="radio"/> | <input type="radio"/> | <input type="radio"/> |  |
|    | 6. Fundoscopy                                                                                                                                                                                                                                                                                               | <input type="radio"/>                                                                                                                                                                                                                           | <input type="radio"/> | <input type="radio"/> | <input type="radio"/> |  |
|    | 7. Joint injection                                                                                                                                                                                                                                                                                          | <input type="radio"/>                                                                                                                                                                                                                           | <input type="radio"/> | <input type="radio"/> | <input type="radio"/> |  |
|    | 8. Strapping an ankle                                                                                                                                                                                                                                                                                       | <input type="radio"/>                                                                                                                                                                                                                           | <input type="radio"/> | <input type="radio"/> | <input type="radio"/> |  |
|    | 9. Cryotherapy (warts)                                                                                                                                                                                                                                                                                      | <input type="radio"/>                                                                                                                                                                                                                           | <input type="radio"/> | <input type="radio"/> | <input type="radio"/> |  |
|    | 10. Setting up an intravenous infusion                                                                                                                                                                                                                                                                      | <input type="radio"/>                                                                                                                                                                                                                           | <input type="radio"/> | <input type="radio"/> | <input type="radio"/> |  |
| 52 | When do you, or your staff, measure <u>blood pressure</u> ? (more than one answer possible)                                                                                                                                                                                                                 | <input type="checkbox"/> In connection with relevant clinical <u>conditions</u><br><input type="checkbox"/> On <u>request</u><br><input type="checkbox"/> Routinely in office contacts with adults ( <u>regardless</u> of the reason for visit) |                       |                       |                       |  |

|  |  |                                                                    |  |
|--|--|--------------------------------------------------------------------|--|
|  |  |                                                                    |  |
|  |  | <input type="checkbox"/> In adults <u>invited</u> for this purpose |  |

|    |                                                                                                                          |                                                                                                                                                                                                                                                                                                                                                                    |                                                                                    |                                                |                                   |
|----|--------------------------------------------------------------------------------------------------------------------------|--------------------------------------------------------------------------------------------------------------------------------------------------------------------------------------------------------------------------------------------------------------------------------------------------------------------------------------------------------------------|------------------------------------------------------------------------------------|------------------------------------------------|-----------------------------------|
| 53 | When do you, or your staff, measure blood cholesterol level? (More than one answer possible)                             | <input type="checkbox"/> In connection with relevant clinical <u>conditions</u><br><input type="checkbox"/> On <u>request</u><br><input type="checkbox"/> Routinely in office contacts with adults ( <u>regardless</u> of the reason for visit)<br><input type="checkbox"/> In adults <u>invited</u> for this purpose<br><input type="checkbox"/> No such measures |                                                                                    |                                                |                                   |
| 54 | To what extent are you involved in the health education as regards the following topics: (More than one answer possible) | <b>Not involved</b>                                                                                                                                                                                                                                                                                                                                                | <b>In connection with normal patient contacts (During one to one consultation)</b> | <b>In group sessions or special programmes</b> |                                   |
|    | 1. Smoking                                                                                                               | <input type="checkbox"/>                                                                                                                                                                                                                                                                                                                                           | <input type="checkbox"/>                                                           | <input type="checkbox"/>                       |                                   |
|    | 2. Diet                                                                                                                  | <input type="checkbox"/>                                                                                                                                                                                                                                                                                                                                           | <input type="checkbox"/>                                                           | <input type="checkbox"/>                       |                                   |
|    | 3. Problematic use of alcohol                                                                                            | <input type="checkbox"/>                                                                                                                                                                                                                                                                                                                                           | <input type="checkbox"/>                                                           | <input type="checkbox"/>                       |                                   |
|    | 4. Physical exercise                                                                                                     | <input type="checkbox"/>                                                                                                                                                                                                                                                                                                                                           | <input type="checkbox"/>                                                           | <input type="checkbox"/>                       |                                   |
| 55 | Are you or your practice staff involved in the following activities:                                                     | <b>Involved</b>                                                                                                                                                                                                                                                                                                                                                    | <b>Not Involved</b>                                                                |                                                |                                   |
|    | 1. Routine antenatal care                                                                                                | <input type="radio"/>                                                                                                                                                                                                                                                                                                                                              | <input type="radio"/>                                                              |                                                |                                   |
|    | 2. Immunisation of children (as part of a programme)                                                                     | <input type="radio"/>                                                                                                                                                                                                                                                                                                                                              | <input type="radio"/>                                                              |                                                |                                   |
|    | 3. Paediatric surveillance of children under 4 years                                                                     | <input type="radio"/>                                                                                                                                                                                                                                                                                                                                              | <input type="radio"/>                                                              |                                                | i.e. child development assessment |
|    | 4. Influenza vaccination (as part of a programme)                                                                        | <input type="radio"/>                                                                                                                                                                                                                                                                                                                                              | <input type="radio"/>                                                              |                                                | e.g. vaccination prior to Haj     |

|    |                                                                                                                                            |                       |                       |                       |                          |                       |
|----|--------------------------------------------------------------------------------------------------------------------------------------------|-----------------------|-----------------------|-----------------------|--------------------------|-----------------------|
|    | 5. Palliative care                                                                                                                         | <input type="radio"/> |                       | <input type="radio"/> |                          |                       |
| 56 | During the past 12 months, have you offered (a) special session(s) or clinics for the following groups?                                    | <b>Yes</b>            |                       | <b>No</b>             |                          |                       |
|    | 1. Diabetic patients                                                                                                                       | <input type="radio"/> |                       | <input type="radio"/> |                          |                       |
|    | 2. Hypertensive patients                                                                                                                   | <input type="radio"/> |                       | <input type="radio"/> |                          |                       |
|    | 3. Pregnant women                                                                                                                          | <input type="radio"/> |                       | <input type="radio"/> |                          |                       |
|    | 4. Elderly                                                                                                                                 | <input type="radio"/> |                       | <input type="radio"/> |                          |                       |
| 57 | If you were confronted through your patient contacts with the following occurrences, would you report this (for instance to an authority)? | <b>Yes</b>            | <b>Probably Yes</b>   | <b>Probably No</b>    | <b>No</b>                | <b>Don't Know</b>     |
|    | 1. Repeated accidents in an industrial setting                                                                                             | <input type="radio"/> | <input type="radio"/> | <input type="radio"/> | <input type="radio"/>    | <input type="radio"/> |
|    | 2. Frequent respiratory problems in patients living near a certain industry                                                                | <input type="radio"/> | <input type="radio"/> | <input type="radio"/> | <input type="radio"/>    | <input type="radio"/> |
|    | 3. Repeated cases of food poisoning among people living in a certain district                                                              | <input type="radio"/> | <input type="radio"/> | <input type="radio"/> | <input type="radio"/>    | <input type="radio"/> |
| 58 | In the past 12 months, about how many days/weeks altogether have you been away from the practice due to:                                   |                       |                       |                       |                          |                       |
|    | 1. Attending conferences or other educational activities                                                                                   | ____ days/weeks       |                       |                       |                          |                       |
|    | 2. Research activities                                                                                                                     | ____ days/weeks       |                       |                       |                          |                       |
|    | 3. Vacations                                                                                                                               | ____ days/weeks       |                       |                       |                          |                       |
|    | 4. Illness                                                                                                                                 | ____ days/weeks       |                       |                       |                          |                       |
| 59 | To what extent do you agree with the following statements?                                                                                 | <b>Strongly Agree</b> | <b>Agree</b>          | <b>Disagree</b>       | <b>Strongly Disagree</b> |                       |
|    | 1. I feel that some parts of my work do not really make sense                                                                              | <input type="radio"/> | <input type="radio"/> | <input type="radio"/> | <input type="radio"/>    |                       |
|    | 2. My work still interests me as much as it ever did                                                                                       | <input type="radio"/> | <input type="radio"/> | <input type="radio"/> | <input type="radio"/>    |                       |
|    | 3. My work is overloaded with unnecessary administrative detail                                                                            | <input type="radio"/> | <input type="radio"/> | <input type="radio"/> | <input type="radio"/>    |                       |
|    | 4. I have too much stress in my                                                                                                            | <input type="radio"/> | <input type="radio"/> | <input type="radio"/> | <input type="radio"/>    |                       |

|    |                                                                 |                                                  |                       |                       |                       |  |
|----|-----------------------------------------------------------------|--------------------------------------------------|-----------------------|-----------------------|-----------------------|--|
|    | current job                                                     |                                                  |                       |                       |                       |  |
|    | 5. Being a medical doctor is a well respected job               | <input type="radio"/>                            | <input type="radio"/> | <input type="radio"/> | <input type="radio"/> |  |
|    | 6. In my work there is a good balance between effort and reward | <input type="radio"/>                            | <input type="radio"/> | <input type="radio"/> | <input type="radio"/> |  |
| 60 | What is your qualification?                                     | <input type="radio"/> Medical officer/GP         |                       |                       |                       |  |
|    |                                                                 | <input type="radio"/> Family Medicine specialist |                       |                       |                       |  |
|    |                                                                 | <input type="radio"/> Medical officer in charge  |                       |                       |                       |  |
|    |                                                                 | <input type="radio"/> Other specialist           |                       |                       |                       |  |

Time End:
